# Supplementary material
Source: ML conference proceedings conference paper supplement (https://proceedings.neurips.cc/paper_files/paper/2021/hash/8e08227323cd829e449559bb381484b7-Abstract.html)
Supplement: Supplementary file 1 [file 8e08227323cd829e449559bb381484b7-Supplemental.zip]

Archive with 37 entries (35 files):
- subneurips2021/
- subneurips2021/appendix.pdf
- subneurips2021/src/
- subneurips2021/src/mail.py
- subneurips2021/src/tmp.txt
- subneurips2021/src/train_tasks.sh
- subneurips2021/src/train_and_predict.sh
- subneurips2021/src/plot.py
- subneurips2021/src/rsyncingmini.sh
- subneurips2021/src/nav_gen.py
- subneurips2021/src/t5-train.py
- subneurips2021/src/score_checkpoints.py
- subneurips2021/src/score_checkpoints_cr.py
- subneurips2021/src/generate_templates.py
- subneurips2021/src/portforward.sh
- subneurips2021/src/tmp.py
- subneurips2021/src/generate_tex.py
- subneurips2021/src/test_block_world.py
- subneurips2021/src/predictions0519.sh
- subneurips2021/src/portforwardmini.sh
- subneurips2021/src/helper2.py
- subneurips2021/src/setup_t5_and_predict.py
- subneurips2021/src/generate_experiments.py
- subneurips2021/src/nav_gen_dw_UNIFORM.py
- subneurips2021/src/test_obj.py
- subneurips2021/src/nav_gen_cr.py
- subneurips2021/src/t5-finetune.py
- subneurips2021/src/nav_gen_dw_UNIFORM2.py
- subneurips2021/src/train_and_predict_mini.sh
- subneurips2021/src/tmpscore.py
- subneurips2021/src/testing.py
- subneurips2021/src/nav_gen_dw.py
- subneurips2021/src/mix.py
- subneurips2021/src/nav_gen_dw_UNIFORM3.py
- subneurips2021/src/rsyncing.sh
- subneurips2021/src/train_and_predict2.sh
- subneurips2021/src/tmp.sh
