# Supplementary material
Source: ML conference proceedings conference paper supplement (https://proceedings.neurips.cc/paper_files/paper/2021/hash/8e08227323cd829e449559bb381484b7-Abstract.html)
Supplement: Supplementary file 1 [file 8e08227323cd829e449559bb381484b7-Supplemental.zip › subneurips2021/src/generate_templates.py]

import random as random
import inflect
import itertools
import time
from multiprocessing import Pool
import tensorflow as tf
from pathlib import Path
import string
import warnings
import os
import numpy as np


def list_to_nl(list_name, list_in):
    """This function converts a list representing a bin and the blocks it contains to 
    a natural language expression of such.
    
    Arguments:
        list_in {list of ints} -- These represent which blocks are contained in this bin
    
    Returns:
        str -- NL expression of which blocks this bin contains
    """
    # Handling different number of blocks for appropriate gammatical cases
    rep = "The {} contains ".format(list_name)
    if len(list_in) == 0:
        rep += "no objects"
    elif len(list_in) == 1:
        rep += str(list_in[0])
    elif len(list_in) == 2:
        rep += "{} and {}".format(str(list_in[0]), str(list_in[1]))
    else:
        rep += "{}, and {}".format(
            ", ".join([str(i) for i in list_in[:-1]]), str(list_in[-1])
        )
    return rep


def generate_and_log_op(list_names, lists, multiple_objects=False):
    """This function generates a random operation on a list of lists and returns both the
    modified lists and the NL expression of the operation.
    
    Arguments:
        lists {list of lists of ints} -- These are lists to be operated on, which operations
        are then logged
    
    Returns:
        list of lists of ints, str -- The modified lists, The NL expression of which 
        modifications were made.
    """
    # Generate a random list to remove a block from and a random list to place a block into,
    # which can be any of the lists besides the one we started with.
    dic = {key: value for (key, value) in zip(np.arange(len(list_names)), list_names)}
    origin_ix = random.choice(np.arange(len(list_names)))
    # If origin_ix list is empty, we want to choose another one to pop from, so we'll keep
    # changing the list while it is empty.
    while len(lists[origin_ix]) == 0:
        origin_ix = (origin_ix + 1) % len(lists)

    # Remove origin_ix from eligible indices so we can choose a different list, not the same one
    # to put the block into
    elig_ix = list(np.arange(len(lists)))
    elig_ix.remove(origin_ix)
    # Draw randomly from the eligible indices to choose a target
    target_ix = np.random.choice(elig_ix)

    # Take random object from origin_ix and put it in target_ix
    obj = random.choice(lists[origin_ix])
    p = inflect.engine()
    if multiple_objects:
        n_objects, obj_name = obj.split()[0], " ".join(obj.split()[1:])
        n_objects = int(n_objects)
        n_taken = np.random.randint(1, n_objects)
        n_left = n_objects - n_taken
        if p.singular_noun(obj_name):
            singular_obj_name = p.singular_noun(obj_name)
        else:
            singular_obj_name = obj_name
        left_obj = f"{n_left} {singular_obj_name if n_left == 1 else obj_name}"
        taken_obj = f"{n_taken} {singular_obj_name if n_taken == 1 else obj_name}"
        lists[origin_ix].remove(obj)
        lists[origin_ix].append(left_obj)
        lists[target_ix].append(taken_obj)

        rep = f"Took {taken_obj} from the {dic[origin_ix]} and put {'them' if n_taken > 1 else 'it'} into the {dic[target_ix]}".format()
    else:
        lists[origin_ix].remove(obj)
        lists[target_ix].append(obj)

        # Construct the NL expression of what happened and return both
        rep = "Took {} from the {} and put it into the {}".format(
            obj, dic[origin_ix], dic[target_ix]
        )
    return lists, rep


def generate_and_log_ops(n_ops, lists):
    """This function takes a list of lists and performs generate_and_log_op on it n_ops times.
    
    Arguments:
        n_ops {int} -- number of times to perform generate_and_log_op on lists
        lists {list of lists of ints} -- bins containing blocks, to be operated on
    
    Returns:
        list of list of ints, list of str -- the modified lists, a list of NL expressions of 
        modifications of the lists explaining what happened in the modifications.
    """
    # List to hold all NL expressions of modifications
    reps = []

    # Simply perform a random modification n_ops times and store the constructed NL expressions, and return
    for i in range(n_ops):
        lists, rep = generate_and_log_op(lists)
        reps.append(rep)
    return lists, reps


# Randomly generate two lists of integers which represent blocks
def generate_lists(
    n_objects,
    n_containers,
    obj_name_file,
    multiple_objects=False,
    data_dir="data/posdata",
):
    """Randomly generate two lists of integers which represent blocks

    Arguments:
        n_objects -- number of objects to generate
        n_containers -- number of containers to place objects in
        data_dir -- directory where obj_name_file is found
        obj_name_file -- name of file containing object names to use.

    Returns:
        tuple of lists -- bins of objects 
    """

    # Generate a number of blocks between 2 and 10 but excluding 5
    lists = [[] for i in range(n_containers)]

    with open(os.path.join(data_dir, obj_name_file), "r") as f:
        # Grab words from file and close it
        all_words = f.readlines()
        # Only keep n_objects of the words and strip whitespace
    kept_words = random.sample(all_words, n_objects)
    words = [word.strip() for word in kept_words]
    # Add proper article a/an
    p = inflect.engine()
    for word in words:
        if multiple_objects:
            n = np.random.randint(3, 7)

            if p.singular_noun(word):
                word = p.singular_noun(word)
            plural_word = p.plural(word)

            word = f"{n} {plural_word}"
        else:
            if word[0] in list("aeiou"):
                word = "an {}".format(word)
            else:
                word = "a {}".format(word)
        random.choice(lists).append(word)
    return lists


def gen_nl_descriptions(lists, list_names):
    """# Generate a NL description of it
    
    Arguments:
        lists -- list of lists of objects
        list_names -- list of names corresponding to lists

    Returns:
        list of nl expressions of the lists
    """
    return [list_to_nl(list_names[i], lists[i]) for i in range(len(lists))]


# Perform random operations on that list, coming up with NL descriptions of those operations
def generate_scenario(
    n_objects,
    n_containers,
    cont_name_file,
    obj_name_file,
    data_dir="data/posdata",
    multiple_objects=False,
):
    """Generate random lists, a NL expression describing it, perform an operation on it and describe it in NL, and describe the final state.

    Arguments:
        n_objects {int} -- number of objects to generate
        n_containers {int}-- number of containers to sort objects into

    Returns:
        str -- Description of initial state, action, and final state
    """
    lists = generate_lists(
        n_objects,
        n_containers,
        obj_name_file,
        data_dir=data_dir,
        multiple_objects=multiple_objects,
    )

    list_names = []
    container_names = open(os.path.join(data_dir, cont_name_file), "r").readlines()
    list_names = random.sample(container_names, n_containers)
    list_names = [name.strip() for name in list_names]
    is_description = ". ".join(gen_nl_descriptions(lists, list_names))
    fs_lists, action_description = generate_and_log_op(
        list_names, lists, multiple_objects=multiple_objects
    )
    prefix = ". ".join([is_description, action_description])
    target = ". ".join(gen_nl_descriptions(fs_lists, list_names))
    target += "."
    return prefix, target


def generate_scenarios(
    n_objs,
    n_conts,
    n=100,
    save_dir="experiments/experiment1/testing",
    data_dir="data/posdata",
    cont_name_file="cont_train_n9.txt",
    obj_name_file="obj_train_n398.txt",
    multiple_objects=False,
):
    # if not os.path.exists(save_dir):
    #    print(save_dir)
    #    os.makedirs(os.path.join('.',save_dir),777)

    prefix_file = open(os.path.join(save_dir, f"prefixes.txt"), "a")
    raw_prefix_file = open(os.path.join(save_dir, f"raw_prefixes.txt"), "a")
    targets_file = open(os.path.join(save_dir, f"targets.txt"), "a")
    for i in range(n):
        raw_prefix, target = generate_scenario(
            n_objs,
            n_conts,
            cont_name_file,
            obj_name_file,
            data_dir=data_dir,
            multiple_objects=multiple_objects,
        )
        prefix = "prefix: " + raw_prefix

        prefix_file.write(prefix + "\n")
        raw_prefix_file.write(raw_prefix + "\n")
        targets_file.write(target + "\n")


def generate_range_of_scenarios(
    n=100,
    n_objs_range=np.arange(2, 20),
    n_conts_range=np.arange(2, 6),
    experiment="experiment1",
    data_dir="data/posdata",
    cont_name_file="cont_train_n9.txt",
    obj_name_file="obj_train_n398.txt",
    multiple_objects=False,
):

    exp_dir = "experiments/c/"
    testing_dir = os.path.join(exp_dir, experiment)

    # Remove these txt files if they already exist.
    for txtfile in "prefixes.txt raw_prefixes.txt targets.txt".split():
        if os.path.exists(os.path.join(testing_dir, txtfile)):
            os.remove(os.path.join(testing_dir, txtfile))

    for n_objs in n_objs_range:
        for n_conts in n_conts_range:
            generate_scenarios(
                n_objs=n_objs,
                n_conts=n_conts,
                n=n,
                save_dir=testing_dir,
                data_dir=data_dir,
                cont_name_file=cont_name_file,
                obj_name_file=obj_name_file,
                multiple_objects=multiple_objects,
            )
    desc = f"""
    The scenarios of this experiment were generated using 
    {os.path.join(data_dir,cont_name_file)} for container names and using
    {os.path.join(data_dir,obj_name_file)} for object names. For each 
    combination of n_objs in {n_objs_range} and n_conts in {n_conts_range}, 
    there are {n} instances. The n_conts increment before the n_objs do e.g. 
    2 objs, 2 conts first, then 2 objs, 3 conts, etc."""

    # (

    #    f"The prefixes, raw_prefixes, and targets files contained in"
    #    + f" {testing_dir} each contain {n} instances for each value of"
    #    + f" of n_objs in {n_objs_range} and n_conts in {n_conts_range}."
    #    + " The n_conts increment before the n_objs do e.g. 2 objs, 2"
    #    + " conts first,"
    #    + " then 2 objs, 3 conts, etc."
    # )

    with open(os.path.join(testing_dir, "desc.txt"), "w") as f:
        f.write(desc)


def generate_word_problems(
    n_scenarios=500,
    targets_file="targets.txt",
    prefixes_file="prefixes.txt",
    names_file="names.txt",
    objects_file="objects.txt",
    data_dir="data/wordprobs",
    base_dir="/mnt/pccfs/backed_up/crytting/atr",
):
    # TODO   Get the "answers" into prefix and target files.
    #       What is the training set?
    #       What is the validation set?

    if not os.exists(base_dir):
        base_dir = "/atr"

    data_dir = os.path.join(base_dir, data_dir)

    with open(os.path.join(data_dir, names_file), "r") as f:
        names = f.read().split("\n")[:-1]

    with open(os.path.join(data_dir, objects_file), "r") as f:
        objects = f.read().split("\n")[:-1]

    problem_types = ["+", "-"]

    with open(os.path.join(data_dir, targets_file), "w"), open(
        os.path.join(data_dir, prefixes_file), "w"
    ) as tfile, pfile:
        for i in range(n_scenarios):

            person1, person2 = np.random.choice(names, 2)

            object = np.random.choice(objects)

            n = np.random.randint(1, 100)
            c = np.random.randint(0, n)

            problem_type = np.random.choice(problem_types)

            if n > 1:
                object += "s"
            if problem_type == "+":
                word_problem = f"{person1} has {n} {object}. Then {person2} gives {person1} {c} more. How many {object} does {person1} have?"

                exact_equation = f"{n} + {c} = {n + c}"
            elif problem_type == "-":
                word_problem = f"{person1} has {n} {object}. Then {person2} takes {c} from {person1}. How many {object} does {person1} have?"

                exact_equation = f"{n} - {c} = {n - c}"

            print(word_problem, exact_equation)


# def predict_from_input_file(
#    model,
#    experiment,
#    input_file,
#    output_file,
#    checkpoints=-1,
#    batch_size=16,
#    temperature=0,
# ):
#
#    model.batch_size = batch_size
#    predict_inputs_path = os.path.join(
#        "/nlrl/experiments/", experiment, f"testing/{input_file}"
#    )
#    predict_outputs_path = os.path.join(
#        "/nlrl/experiments/", experiment, f"testing/{output_file}"
#    )
#
#    if isinstance(checkpoints, list):
#        checkpoints = [int(ckpt) for ckpt in checkpoints]
#
#    model.predict(
#        input_file=predict_inputs_path,
#        output_file=predict_outputs_path,
#        checkpoint_steps=checkpoints,
#        # Select the most probable output token at each step.
#        temperature=temperature,
#    )
#
#
# def setup_t5_and_predict(
#    input_file="prefixes.txt",
#    output_file="predictions.txt",
#    checkpoints=[-1],
#    model_parallelism=1,
#    batch_parallelism=1,
#    gpu_ids=[0],
#    experiment="experiment1",
#    train_batch_size=16,
#    temperature=0.0,
# ):
#    checkpoints = list(checkpoints)
#
#    model = t5.models.MtfModel(
#        model_dir="/nlrl/models-t5/3B",
#        tpu=None,
#        mesh_shape=f"model:{model_parallelism},batch:{batch_parallelism}",
#        mesh_devices=[f"gpu:{int(gpu_id)}" for gpu_id in gpu_ids],
#        batch_size=train_batch_size,
#        sequence_length={"inputs": 250, "targets": 250},
#        iterations_per_loop=100,
#    )
#
#    predict_from_input_file(
#        model,
#        experiment,
#        input_file,
#        output_file,
#        checkpoints=checkpoints,
#        temperature=temperature,
#    )


def generate_dataset(
    cont_name_file,
    obj_name_file,
    file_name,
    dest_dir="data/objcontprobs/",
    n_scenarios=10000,
    nolow=2,
    nohigh=9,
    nclow=2,
    nchigh=4,
    train_test_split=0.8,
):
    """Write n scenarios to a text file with directory filepath
    
    Arguments:
        n_scenarios {int} -- The number of scenarios we want to generate
        filepath {str}    -- The filepath we of the file we want to write
    """

    tf.io.gfile.makedirs(dest_dir)
    with open(
        os.path.join(dest_dir, file_name[:-4] + "-train" + file_name[-4:]), "w"
    ) as ftrain, open(
        os.path.join(dest_dir, file_name[:-4] + "-validation" + file_name[-4:]), "w"
    ) as fval:
        n_train = n_scenarios * train_test_split
        for i in range(n_scenarios):
            n_objects = random.randint(nolow, nohigh)
            n_containers = random.randint(nclow, nchigh)
            prefix, target = generate_scenario(
                n_objects, n_containers, cont_name_file, obj_name_file
            )
            if i < n_train:
                ftrain.write(prefix + ". " + target + "\n")
            else:
                fval.write(prefix + ". " + target + "\n")

    with open(os.path.join(dest_dir, "desc.txt"), "w") as f:
        f.write(
            f"The file {os.path.join(dest_dir, file_name)} contains {n_scenarios} scenarios, each randomly containing anywhere from {nolow} to {nohigh} objects and {nclow} to {nchigh} containers. The file was written by generate_templates.generate_dataset() and drew container names from {cont_name_file} and object names from {obj_name_file} in 'data/posdata'"
        )
    print("Successfully generated dataset")


def generate_experiments(
    model_names,
    data_names,
    obj_name_files,
    data_dirs=None,
    cont_name_files=None,
    n=100,
):
    """
    Create a set of experiment directories named according to what model and what set of scenarios it will be tested on.
    """
    if not cont_name_files:
        cont_name_files = ["cont_train_n9.txt"] * len(data_names)
    if not data_dirs:
        data_dirs = ["data/posdata"] * len(data_names)

    for model_name in model_names:
        for data_name, data_dir, obj_name_file, cont_name_file in zip(
            data_names, data_dirs, obj_name_files, cont_name_files
        ):

            experiment = "experiment-" + model_name + "-" + data_name
            tf.io.gfile.makedirs(os.path.join(f"experiments/c/{experiment}/"))
            generate_range_of_scenarios(
                n=n,
                experiment=experiment,
                data_dir=data_dir,
                cont_name_file=cont_name_file,
                obj_name_file=obj_name_file,
            )


def parallel_generate_experiments(
    model_names,
    data_names,
    obj_name_files,
    data_dirs=None,
    cont_name_files=None,
):
    with Pool() as p:
        start = time.time()
        args = [
            (
                [model_name],
                [data_name_obj_name_file[0]],
                [data_name_obj_name_file[1]],
            )
            for model_name, data_name_obj_name_file in list(
                itertools.product(model_names, zip(data_names, obj_name_files))
            )
        ]
        print(args)
        p.starmap(generate_experiments, args)
        print(f"Took {time.time() - start} seconds")


def generate_random_strings(
    N=618, length=10, data_dir="/atr/data/", file_name="random_strings.txt"
):
    with open(os.path.join(data_dir, file_name), "a") as f:
        for _ in range(N):
            length = random.randint(3, 15)
            rs = "".join(
                random.choices(
                    string.ascii_uppercase + string.digits + string.ascii_lowercase,
                    k=length,
                )
            )
            f.write(rs + "\n")


if __name__ == "__main__":
    #generate_dataset(
    #   "cont_train_n9.txt",
    #   "2000_most_concrete_train_nouns.txt",
    #   "atr.txt",
    #   dest_dir="data/objcontprobs/2000_concrete_train_nouns",
    #)
    #generate_dataset(
    #   "cont_train_n9.txt",
    #   "200_most_concrete_train_nouns.txt",
    #   "atr.txt",
    #   dest_dir="data/objcontprobs/200_concrete_train_nouns",
    #)
    #generate_dataset(
    #   "cont_train_n9.txt",
    #   "20_most_concrete_train_nouns.txt",
    #   "atr.txt",
    #   dest_dir="data/objcontprobs/20_concrete_train_nouns",
    #)
    models = 'all concrete common 2000'.split() 
    data_names = 'verbs toverbs random'.split()
    obj_name_files ='2000uniqueverbs.txt 2000uniquetoverbs.txt 2000uniquerandomstrings.txt'.split()
    generate_experiments(models, data_names, obj_name_files, n=20)

    #model_names = "20nouns 200nouns 2000nouns".split()
    #data_names = "nouns verbs random".split()
    #obj_name_files = "2000_most_concrete_train_nouns.txt 2000uniqueverbs.txt 2000uniquerandomstrings.txt".split()
    #generate_experiments(model_names, data_names, obj_name_files, n=20)

    # parallel_generate_experiments(model_names, data_names, file_names)

    # model_names = 'all common concrete 2000'.split()
    # data_names = 'all-val common-val concrete-val'.split()
    # file_names = 'all_davies_nouns_val.txt 2000_most_common_davies_nouns_val.txt 2000_most_concrete_davies_nouns_val.txt'.split()
    # parallel_generate_experiments(model_names, data_names, file_names)

    # generate_dataset(
    #    "cont_train_n9.txt",
    #    "nounlist_desiquintans_train.txt",
    #    "atr.txt",
    #    dest_dir="data/objcontprobs/nounlistdesiquintans",
    # )
    # generate_dataset(
    #    "cont_train_n9.txt",
    #    "2000_most_concrete_davies_nouns_train.txt",
    #    "atr.txt",
    #    dest_dir="data/objcontprobs/2000_most_concrete_davies_train_nouns",
    # )
    # generate_dataset(
    #    "cont_train_n9.txt",
    #    "2000_most_common_davies_nouns_train.txt",
    #    "atr.txt",
    #    dest_dir="data/objcontprobs/2000_most_common_davies_train_nouns",
    # )
    # generate_dataset(
    #    "cont_train_n9.txt",
    #    "2000_davies_nouns_train.txt",
    #    "atr.txt",
    #    dest_dir="data/objcontprobs/2000_davies_train_nouns",
    # )
    # generate_dataset(
    #    "cont_train_n9.txt",
    #    "all_davies_nouns_train.txt",
    #    "atr.txt",
    #    dest_dir="data/objcontprobs/all_davies_train_nouns",
    # )
