# Supplementary material
Source: ML conference proceedings conference paper supplement (https://proceedings.neurips.cc/paper_files/paper/2021/hash/8e08227323cd829e449559bb381484b7-Abstract.html)
Supplement: Supplementary file 1 [file 8e08227323cd829e449559bb381484b7-Supplemental.zip › subneurips2021/src/helper2.py]

import sys
import os


fn = sys.argv[2]
data_dir = sys.argv[1]

preds = open(os.path.join(data_dir,fn),"r").readlines()
preds = [ l.strip() for l in preds ]

prefs = open(os.path.join(data_dir, "prefixes.txt"),"r").readlines()
prefs = [ l.strip() for l in prefs ]

targs = open(os.path.join(data_dir, "targets.txt"),"r").readlines()
targs = [ l.strip() for l in targs ]

for ind,pref in enumerate( prefs ):
    print("=======================================")
    print( prefs[ind] )
    print( preds[ind] )
    print( targs[ind] )
