# Supplementary material
Source: ML conference proceedings conference paper supplement (https://proceedings.neurips.cc/paper_files/paper/2021/hash/8e08227323cd829e449559bb381484b7-Abstract.html)
Supplement: Supplementary file 1 [file 8e08227323cd829e449559bb381484b7-Supplemental.zip › subneurips2021/src/mail.py]

import smtplib, ssl
import argparse
import getpass

parser = argparse.ArgumentParser()
parser.add_argument('message', type=str)
args = parser.parse_args()

sender_email = "pythonichris@gmail.com"
receiver_email = "christophermichaelrytting@gmail.com"
message = f"""\
Subject: From Pythonichris

{args.message}"""

# Send email here

port = 465  # For SSL
#password = getpass.getpass("Type your password and press enter: ")

# Create a secure SSL context
context = ssl.create_default_context()

with smtplib.SMTP_SSL("smtp.gmail.com", port, context=context) as server:
    server.login(sender_email, password)
    # TODO: Send email here
    server.sendmail(sender_email, receiver_email, message)
