# Supplementary material
Source: ML conference proceedings conference paper supplement (https://proceedings.neurips.cc/paper_files/paper/2021/hash/8e08227323cd829e449559bb381484b7-Abstract.html)
Supplement: Supplementary file 1 [file 8e08227323cd829e449559bb381484b7-Supplemental.zip › subneurips2021/src/portforward.sh]

#!/bin/bash


kubectl port-forward pods/cmr-i1  2222:22 &
kubectl port-forward pods/cmr-i2  2223:22 &
kubectl port-forward pods/cmr-i3  2224:22 &
kubectl port-forward pods/cmr-i4  2225:22 &
kubectl port-forward pods/cmr-i5  2226:22 &
kubectl port-forward pods/cmr-i6  2227:22 &
kubectl port-forward pods/cmr-i7  2228:22 &
kubectl port-forward pods/cmr-i8  2229:22 &
kubectl port-forward pods/cmr-i9  2230:22 &
kubectl port-forward pods/cmr-i10 2231:22 &
