# Supplementary material
Source: ML conference proceedings conference paper supplement (https://proceedings.neurips.cc/paper_files/paper/2021/hash/8e08227323cd829e449559bb381484b7-Abstract.html)
Supplement: Supplementary file 1 [file 8e08227323cd829e449559bb381484b7-Supplemental.zip › subneurips2021/src/rsyncing.sh]

#!/bin/bash

rsync -r --progress -e 'ssh -p 2222' models-t5/3Barc-challenge    root@localhost:atr/models-t5
rsync -r --progress -e 'ssh -p 2223' models-t5/3Barc-easy         root@localhost:atr/models-t5
rsync -r --progress -e 'ssh -p 2224' models-t5/3Bphysicaliqaprobs root@localhost:atr/models-t5
rsync -r --progress -e 'ssh -p 2225' models-t5/3Btom              root@localhost:atr/models-t5
rsync -r --progress -e 'ssh -p 2226' models-t5/3Btom0             root@localhost:atr/models-t5
rsync -r --progress -e 'ssh -p 2227' models-t5/3Btom10            root@localhost:atr/models-t5
rsync -r --progress -e 'ssh -p 2228' models-t5/3Btomeasy0         root@localhost:atr/models-t5
rsync -r --progress -e 'ssh -p 2229' models-t5/3Btomeasy10        root@localhost:atr/models-t5
rsync -r --progress -e 'ssh -p 2230' models-t5/3Bwordprobs        root@localhost:atr/models-t5
