# Supplementary material
Source: ML conference proceedings conference paper supplement (https://proceedings.neurips.cc/paper_files/paper/2021/hash/8e08227323cd829e449559bb381484b7-Abstract.html)
Supplement: Supplementary file 1 [file 8e08227323cd829e449559bb381484b7-Supplemental.zip › subneurips2021/src/testing.py]

#The newer version of test.py
import generate_templates as gt
import time
import t5
import re
import pickle
import numpy as np
import os

def compare_txt_g(targettxt, predtxt, gibberish = False):
    """
    This function compares a target txt file and a predictions txt file and 
    returns a dict with 

    Arguments:

    targettxt {str} -- target text file path
    predtxt {str} -- predictions text file path

    Returns:

    score_dict {dict} -- contains scores for each combination of n_objs and 
    n_conts
    """

    with open(targettxt, 'r') as targetfile, open(predtxt, 'rb') as predfile:
        targets = [target.strip().lower() for target in targetfile.readlines()]
        
        preds = [pred.decode()[1:].strip().lower() for pred in predfile.readlines()]
        #preds = [pred[1:].strip().decode().lower() for pred in predfile.readlines()]

        scores_dic = {}
        running_bleu = 0.0
        running_exact_match = 0.0
        running_substr_match = 0.0
        for i, predtarget in enumerate(zip(preds,targets)):
            pred, target = predtarget[0], predtarget[1]
            predre = re.search('[a-z0-9].*\.', pred)
            targetre = re.search('[a-z0-9].*\.', target)
            if predre and targetre:
                pred = predre.group(0)
                target = targetre.group(0)
            else:
                print(target)
                print(pred)
                pass
            running_bleu += t5.evaluation.metrics.bleu(
                                          [target], [pred])['bleu']
            if pred == target:
                running_exact_match += 1.0

            if pred == target:
                print(f'Match at line {i}! \n\nPred: {pred}\n\nTarget: {target}')
            else:
                print(f'Did not match at line {i}! \n\nPred: {pred}\n\nTarget: {target}')
            input()
            ind_substr_match_count = 0.0
            substrs = pred.split('.')[:-1]
            n_substrs = len(substrs)
            if n_substrs == 0:
                n_substrs = -1
            for token in substrs:
                if token.strip() in target:
                    ind_substr_match_count+=1.0
            ind_substr_match_ratio = ind_substr_match_count / n_substrs
            running_substr_match += ind_substr_match_ratio
            
        n = len(preds)
        avg_bleu = running_bleu / n / 100
        avg_exact_score = running_exact_match / n
        avg_substr_match = running_substr_match / n

        scores_dic["avg_bleu"] = avg_bleu
        scores_dic["avg_exact_score"] = avg_exact_score
        scores_dic["avg_substr_match"] = avg_substr_match


        return scores_dic

def compare_txt_files(targettxt, predtxt, n_objs_range, n_conts_range, n=100):
    """
    This function compares a target txt file and a predictions txt file and 
    returns a dict with 

    Arguments:

    targettxt {str} -- target text file path
    predtxt {str} -- predictions text file path
    n {int} -- number of instances for each combination of n_objs and n_conts
    n_objs_range {list} -- list of values of n_objs
    n_conts_range {list} -- list of values of n_conts

    Returns:

    score_dict {dict} -- contains scores for each combination of n_objs and 
    n_conts
    """

    with open(targettxt, 'r') as targetfile, open(predtxt, 'rb') as predfile:
        targets = [target.strip() for target in targetfile.readlines()]
        
        preds = [pred[1:].strip() for pred in predfile.readlines()]

        n_objs_bins = len(n_objs_range)
        n_conts_bins = len(n_conts_range)
        n_bins = n_objs_bins * n_conts_bins

        scores_dic = {}

        assert (len(targets) / n_objs_bins / n_conts_bins) == n

        running_bleu_all, running_exact_all, running_substr_all = 0.0, 0.0, 0.0
        for i, n_objs in enumerate(n_objs_range):
            for j, n_conts in enumerate(n_conts_range):
                running_bleu = 0.0
                running_exact_match = 0.0
                running_substr_match = 0.0
                for k in range(n):
                    #print(f"\nIteration {k}\n")
                    ix = n*(len(n_conts_range)*i+j) + k
                    #print(i,j,ix)
                    target = targets[ix].lower()
                    pred = preds[ix].decode()[3:-1].lower()
                    #print(target)
                    #print(pred)
                    target_try = re.search('the.*\.', target)
                    pred_try = re.search('the.*\.', pred)
                    if target_try and pred_try:
                        target = re.search('the.*\.', target).group(0)
                        pred = re.search('the.*\.', pred).group(0)
                    else:
                        print("No period at the end of:")
                        print(pred)
                        print(target)
                    #print(target)
                    #print(pred)
                    #print(target==pred)
                    #input()
                    running_bleu += t5.evaluation.metrics.bleu(
                                                  [target], [pred])['bleu']
                    #if n_objs==8 and n_conts==3:
                    #    if pred == target:
                    #        print(f'Match! \n\nPred: {pred}\n\nTarget: {target}')
                    #    else:
                    #        print(f'Did not match! \n\nPred: {pred}\n\nTarget: {target}')
                    #    input()
                    if pred == target:
                        running_exact_match += 1.0

                    ind_substr_match_count = 0.0
                    substrs = pred.split('.')[:-1]
                    n_substrs = len(substrs)
                    if n_substrs == 0:
                        n_substrs = -1
                    for token in substrs:
                        if token.strip() in target:
                            ind_substr_match_count+=1.0
                    ind_substr_match_ratio = ind_substr_match_count / n_substrs
                    running_substr_match += ind_substr_match_ratio
                    
                avg_bleu = running_bleu / n / 100
                avg_exact_score = running_exact_match / n
                avg_substr_match = running_substr_match / n

                scores_dic_key = f"{n_objs}objs{n_conts}conts"
                scores_dic[scores_dic_key] = {}
                scores_dic[scores_dic_key]["avg_bleu"] = avg_bleu
                scores_dic[scores_dic_key]["avg_exact_score"] = avg_exact_score
                scores_dic[scores_dic_key]["avg_substr_match"] = avg_substr_match

                running_bleu_all += avg_bleu
                running_exact_all += avg_exact_score
                running_substr_all += avg_substr_match
        scores_dic['avg_bleu'] = running_bleu_all / n_bins
        scores_dic['avg_exact_score'] = running_exact_all / n_bins
        scores_dic['avg_substr_match'] = running_substr_all / n_bins

        return scores_dic

        


def conduct_tests(
    n_objs_to_test,
    n_containers_to_test,
    sess,
    gpt2,
    run_name,
    batch_size=1,
    testing_conts=False,
    testing_nouns=False,
    test_cases=20,
    temperature=0.1,
):
    """
    Performs `conduct_test` on a range of n_objects and n_containers

    Arguments:
        n_objs_to_test {list[int]} -- list of different n_objs to test
        n_containers_to_test {list[int]} -- list of different n_containers to 
        test
        sess {?} -- sess object begun in tensorflow
        gpt2 {module?} -- a gpt2 object with loaded weights
        run_name {str} -- [description]
    
    Keyword Arguments:
        testing {bool} -- [description] (default: {False})
        test_cases {int} -- number of test cases to run for each combination of
        n_objs and n_containers (default: {20})
        temperature {float} -- [description] (default: {0.1})
    
    Returns:
        results_dic -- A dictionary whose keys are i_objs_j_containers where i 
        is number of objects and j is number of containers
    """

    results_dic = {}
    for i, n_objs in enumerate(n_objs_to_test):
        for j, n_containers in enumerate(n_containers_to_test):
            print(test_cases)
            result_dic = conduct_test(
                n_objs,
                n_containers,
                sess,
                gpt2,
                run_name,
                batch_size=batch_size,
                test_cases=test_cases,
                testing_conts=testing_conts,
                testing_nouns=testing_nouns,
                temperature=temperature,
            )
            print(
                "Score for {}_objs_{}_containers_{}_checkpoint = {}".format(
                    n_objs, n_containers, run_name, result_dic["score"]
                )
            )
            results_dic[
                "{}_objs_{}_containers".format(n_objs, n_containers)
            ] = result_dic
    return results_dic

def conduct_test_t5(
    n_objs,
    n_containers,
    checkpoint="latest",
    test_cases=100,
    
    testing_conts=False,
    testing_nouns=False,
    n_val_nouns=0,
):
    """    
    Generates test cases given a t5 model, an initial state and an action. 
    The generated dictionary contains the true scenario, the generated scenario,
    the prefix and the score.
    
    Arguments:
        n_objs {int} -- number of objects in scenario
        n_containers {int} -- number of containers in scenario
        sess {?} -- sess object started in tensorflow
        gpt2 {module?} -- trained gpt2 model with loaded weights
        run_name {str} -- which checkpoint folder gpt2 is loaded from
        step {str} -- 
    
    Keyword Arguments:
        testing {bool} -- whether or not to test on validation nouns or training
        nouns (default: {False})
        temperature {float} -- temperature for generation. A higher value will
        result in more interesting text generated, so a lower value is typically
        better (default: {0.7})
    
    Returns:
        result_dic{dict} -- This dictionary has the true scenarios, the prefixes
        extracted from the true scenario, the generated scenarios, and the 
        match booleans for all test_cases, along with an average score which 
        is number of matches divided by number of test_cases.
    """

    truncate = "<END>"
    acc_count = 0.0
    substr_score_total = 0.0
    result_dic = {}
    for i in range(test_cases):

        split1 = time.time()
        true_scenario = gt.generate_scenario(
            n_objs,
            n_containers,
            n_val_nouns=n_val_nouns,
            testing_conts=testing_conts,
            testing_nouns=testing_nouns)
        prefix = re.search(".*Took[^/.]*", true_scenario).group(0)
        true_fs = true_scenario.replace(prefix, "")
        true_fs_components = true_fs.split(".")[1:-1]

        split2 = time.time()
        print(
            "Took {} seconds to generate_scenario for test case {}".format(
                split2 - split1, i
            )
        )
        split1 = split2

        predicted_scenario = (
            gpt2.generate(
                sess,
                prefix=prefix,
                run_name=run_name,
                truncate=truncate,
                return_as_list=True,
                temperature=temperature,
            )[0]
            + truncate
        )

        split2 = time.time()
        print(
            "Took {} seconds to generate final state for test case {}".format(
                split2 - split1, i
            )
        )
        split1 = split2

        predicted_fs = predicted_scenario.replace(prefix, "")
        # Exact equality check
        match = true_scenario == predicted_scenario

        # Score on substrings
        substr_score = 0.0
        for true_fs_component in true_fs_components:
            if true_fs_component in predicted_fs:
                substr_score += 1
        substr_score /= len(true_fs_components)

        # Log results in a dic
        result_dic["true_scenario_{}".format(i)] = true_scenario
        result_dic["prefix_{}".format(i)] = prefix
        result_dic["predicted_scenario_{}".format(i)] = predicted_scenario
        result_dic["match_{}".format(i)] = match

        substr_score_total += substr_score
        if match:
            acc_count += 1

        split2 = time.time()
        print("Took {} seconds to score test case {}".format(split2 - split1, i))
        split1 = split2

    exeq_score = acc_count / test_cases
    mean_substr_score = substr_score_total / test_cases
    result_dic["score"] = exeq_score
    result_dic["substr_score"] = mean_substr_score
    return result_dic


##Realized this wont work because you have to start a new python session every time you make a new model.
# def conduct_test_across_checkpoints(checkpoint_list,n_objs, n_containers,sess,gpt2,
#    test_cases = 10, testing = False, temperature = 0.7):
#    results_dic = {}
#    for checkpoint in checkpoint_list:
#        result_dic = conduct_test(n_objs,n_containers,sess,gpt2,checkpoint,
#            test_cases=test_cases,testing_conts=testing, testing_nouns=testing,
#            temperature=temperature)
#        print('Score for {}_objs_{}_containers at checkpoint {} = {}'.format(
#            n_objs, n_containers, checkpoint, result_dic['score']))
#        results_dic['{}_objs_{}_containers_{}_checkpoint'.format(n_objs,n_containers,checkpoint)] = result_dic
#    return results_dic
def extract_score(p_file):
    """
    Given a pickle with results for a given n_objs and n_containers, find the 
    score for it
    """
    p_file = load_pickle(p_file)
    return p_file["score"]


def score_dic_on_substrings(result_dic, n_test_cases=20):
    """
    Given a test case dictionary, score on substrings as opposed to exact 
    equality
    """

    case_scores = []

    for i in range(n_test_cases):

        # Get each part of the true final state
        true_scenario = result_dic["true_scenario_{}".format(i)]
        prefix = result_dic["prefix_{}".format(i)]
        true_fs = true_scenario.replace(prefix, "")
        true_fs_components = true_fs.split(".")[1:-1]

        # Get the generated final state
        generated_scenario = result_dic["predicted_scenario_{}".format(i)]
        generated_fs = generated_scenario.replace(prefix, "")

        # Find what proportion of the true final state elements are found in the
        # generated final state
        score = 0.0
        for true_fs_component in true_fs_components:
            if true_fs_component in generated_fs:
                score += 1
        score /= len(true_fs_components)
        case_scores.append(score)

    # Average over all test case scores
    case_score_mean = np.mean(case_scores)
    return case_score_mean


def gather_scores_for_dics(
    n_objs_list,
    n_containers_list,
    experiment_name,
    n_test_cases,
    other="",
    testing=False,
):

    accuracies = np.ones((len(n_containers_list), len(n_objs_list))) * -1
    for i, n_objs in enumerate(n_objs_list):
        pickle_name = "results/{}/results_dic_{}_nouns_{}_objects{}.p".format(
            experiment_name, "test" if testing else "train", n_objs, other
        )
        results_dic = load_pickle(pickle_name)
        for j, n_containers in enumerate(n_containers_list):
            key_name = "{}_objs_{}_containers".format(n_objs, n_containers)
            result_dic = results_dic[key_name]
            score = score_dic_on_substrings(
                result_dic, n_containers, n_test_cases=n_test_cases
            )
            # print(score)
            accuracies[j, i] = score
    # print(accuracies)
    return accuracies


def score_trajectory_given(n_containers, n_objs, test=False):
    """
    Find scores across all checkpoints for a given n_containers/n_objs
    """
    scores = []
    for run_name in np.arange(10, 3650, 10):
        curr_score = load_pickle(
            "results_dic_night_before_600/"
            "results_dic_{}_{}_objs_{}_containers_600_nouns_{}.p".format(
                "test" if test else "train", n_objs, n_containers, run_name
            )
        )["score"]
        scores.append(curr_score)
    return scores


def score_run(
    run_dir,
    checkpoint,
    n_objs_list=None,
    n_containers_list=None,
    substring=False,
    test=False,
):
    """
    Find the average score across n_objs and n_containers for a given run
    """
    scores = []
    if not n_objs_list:
        n_objs_list = np.arange(1, 19)
    if not n_containers_list:
        n_containers_list = np.arange(2, 6)
    for n_objs in n_objs_list:
        for n_containers in n_containers_list:
            result_dic = load_pickle(
                "{}/"
                "results_dic_{}_{}_objs_{}_containers_600_nouns_{}.p".format(
                    run_dir,
                    "test" if test else "train",
                    n_objs,
                    n_containers,
                    checkpoint,
                )
            )
            if substring:
                curr_score = result_dic["substr_score"]
            else:
                curr_score = result_dic["score"]
            scores.append(curr_score)
    return np.mean(scores)


def score_runs(
    run_dir,
    checkpoint_list,
    n_objs_list=None,
    n_containers_list=None,
    substring=False,
    test=False,
):
    """
    Find the average score across n_objs and n_containers for a range of 
    runs (this range is hard coded in for now)
    """
    scores = []
    for checkpoint in checkpoint_list:
        score = score_run(
            run_dir,
            checkpoint,
            n_objs_list=n_objs_list,
            n_containers_list=n_containers_list,
            substring=substring,
            test=test,
        )
        scores.append(score)
    return scores


def score_pickle(pickle_name):
    result_dic = load_pickle(pickle_name)
    score = score_dic_on_substrings(result_dic, 19)
    return score


def load_pickle(pickle_name):
    """Loads a pickle"""
    result = pickle.load(open(pickle_name, "rb"))
    return result


def dump_pickle(thing, pickle_name):
    """Dumps thing into pickle_name"""
    return pickle.dump(thing, open(pickle_name, "wb"))


if __name__ == "__main__":
    start = split1 = time.time()
    import gpt_2_simple as gpt2
    import time
    import t5
    import numpy as np
    import pickle
    import argparse

    parser = argparse.ArgumentParser(description="Run gpt2 test suite")
    # TODO add option to give a list of objects and a list of containers
    # from command line maybe
    parser.add_argument("--n_objects", type=int)
    parser.add_argument("--n_containers", type=int)
    parser.add_argument("--test_cases", type=int)
    parser.add_argument("--checkpoint")
    parser.add_argument("--run_name")
    parser.add_argument("--save_dir")
    parser.add_argument("--n_val_nouns", type=int)
    parser.add_argument("--testing", action="store_true")
    args = parser.parse_args()

    if args.n_objects:
        n_objects_list = [args.n_objects]
    else:
        n_objects_list = np.arange(1, 19)

    if args.n_containers:
        n_containers_list = [args.n_containers]
    else:
        n_containers_list = np.arange(2, 6)

    run_name = args.run_name
    testing = args.testing
    test_cases = args.test_cases
    checkpoint = args.checkpoint

    split2 = time.time()
    print("Took {} seconds to set up testing".format(split2 - split1))
    split1 = split2

    sess = gpt2.start_tf_sess()
    gpt2.load_gpt2(sess, checkpoint=checkpoint, run_name=run_name)

    split2 = time.time()
    print("Took {} seconds to load and start sess".format(split2 - split1))
    split1 = split2
    # results_dic = conduct_tests(n_objects, n_containers, sess, gpt2,\
    #    run_name, testing_conts=testing, testing_nouns = testing,
    #    test_cases = test_cases)
    for n_objects in n_objects_list:
        for n_containers in n_containers_list:

            result_dic = conduct_test(
                n_objects,
                n_containers,
                sess,
                gpt2,
                run_name,
                checkpoint=checkpoint,
                n_val_nouns=args.n_val_nouns,
                testing_conts=testing,
                testing_nouns=testing,
                test_cases=test_cases,
            )
            filename = "{}/results_dic_{}_{}_objs_{}_containers_{}_{}.p".format(
                args.save_dir,
                "test" if testing else "train",
                n_objects,
                n_containers,
                run_name,
                checkpoint
            )
            if not os.path.exists(os.path.dirname(filename)):
                try:
                    os.makedirs(os.path.dirname(filename))
                except OSError as exc:
                    if exc.errno != errno.EEXIST:
                        raise
            f = open(filename, "wb")
            pickle.dump(result_dic, f)
            f.close()
            print(
                "Took {} seconds to test {} objects {} containers".format(
                    time.time() - start, n_objects, n_containers
                )
            )
