# Supplementary material
Source: ML conference proceedings conference paper supplement (https://proceedings.neurips.cc/paper_files/paper/2021/hash/8e08227323cd829e449559bb381484b7-Abstract.html)
Supplement: Supplementary file 1 [file 8e08227323cd829e449559bb381484b7-Supplemental.zip › subneurips2021/src/tmp.py]

print(b' \xe2\x81\x87  no bones, the bowl contains no objects, and the case contains no objects. \xe2\x81\x87 . \xe2\x81\x87   \xe2\x81\x87 . \xe2\x81\x87  a hammer and no objects. \xe2\x81\x87 n \xe2\x81\x87   \xe2\x81\x87 . \xe2\x81\x87   \xe2\x81\x87  The box contains no objects.'.decode())
