# Supplementary material
Source: ML conference proceedings conference paper supplement (https://proceedings.neurips.cc/paper_files/paper/2021/hash/8e08227323cd829e449559bb381484b7-Abstract.html)
Supplement: Supplementary file 1 [file 8e08227323cd829e449559bb381484b7-Supplemental.zip › subneurips2021/src/tmp.sh]

#!/bin/bash

export LOGNAME=christophermichaelrytting@gmail.com
echo $LOGNAME
echo test|mail -s 'your subject' $LOGNAME
