# Supplementary material
Source: ML conference proceedings conference paper supplement (https://proceedings.neurips.cc/paper_files/paper/2021/hash/8e08227323cd829e449559bb381484b7-Abstract.html)
Supplement: Supplementary file 1 [file 8e08227323cd829e449559bb381484b7-Supplemental.zip › subneurips2021/src/tmp.txt]

Obj

        No match
        Prefix: 
        initialstate&action: The tub contains a laundering, a nigiri, and a militiamen. T
        he basket contains a finesse, an expectancies, and an annoyance. The bin contains
         a yarmulke and a scotomas. The bag contains an archdioceses, a flair, a phenoms,
         a wimples, a buyback, and a mockeries. The case contains a purity, a double-talk
        , an altar, a voles, and a mini-dress. Took a scotomas from the bin and put it in
        to the tub

        Pred: the tub contains a laundering, a nigiri, a militiamen, and a scotomas. the bask
        et contains a finesse, an expectancies, and an annoyance. the bin contains a yarmulke
        . the bag contains an archdioceses, a flair, a phenoms, a wimples, a buyback, and a m
        ockeries.

        Target: the tub contains a laundering, a nigiri, a militiamen, and a scotomas. the ba
        sket contains a finesse, an expectancies, and an annoyance. the bin contains a yarmul
        ke. the bag contains an archdioceses, a flair, a phenoms, a wimples, a buyback, and a
         mockeries. the case contains a purity, a double-talk, an altar, a voles, and a mini-
        dress.
        ---
        prefix:
        initialstate&action: The bin contains an urbanities, a javelins, and a taurus. Th
        e bowl contains a vote-getter, a transmutations, an a-frames, a merrymaking, and
        an aneurism. The jar contains a hump. The bag contains an episode and a pastures.
         The case contains an amides, an epaulet, an ambergris, a puritans, and a muskets
        . Took a puritans from the case and put it into the bin

        Pred: the bin contains an urbanities, a javelins, a taurus, and a puritans. the bowl
        contains a vote-getter, a transmutations, an a-frames, a merrymaking, and an aneurism
        . the jar contains a hump. the bag contains an episode and a pastures.

        Target: the bin contains an urbanities, a javelins, a taurus, and a puritans. the bow
        l contains a vote-getter, a transmutations, an a-frames, a merrymaking, and an aneuri
        sm. the jar contains a hump. the bag contains an episode and a pastures. the case con
        tains an amides, an epaulet, an ambergris, and a muskets.


        Match

        Prefix: 
        The crate contains a ligament and a vee. The bag contains a
             sodium, a meticulousness, a conman, a cascade, and a sundeck. The box contains a
             telegraphs. The bin contains a bunts, a lacquer, a canto, and a wheelchairs. The
             jar contains a suedes, a punishments, a parchments, and a webs. Took a webs from
             the jar and put it into the bin


        Pred: the crate contains a ligament and a vee. the bag contains a sodium, a meticulou
        sness, a conman, a cascade, and a sundeck. the box contains a telegraphs. the bin con
        tains a bunts, a lacquer, a canto, a wheelchairs, and a webs. the jar contains a sued
        es, a punishments, and a parchments.

        Target: the crate contains a ligament and a vee. the bag contains a sodium, a meticul
        ousness, a conman, a cascade, and a sundeck. the box contains a telegraphs. the bin c
        ontains a bunts, a lacquer, a canto, a wheelchairs, and a webs. the jar contains a su
        edes, a punishments, and a parchments.

        ----
        prefix: 
        initialstate&action: The box contains a four-wheeler, a rhetorics, a noises, a pa
        yback, and an endeavours. The basket contains a bitching, a goys, a thunderheads,
         and an estimations. The bag contains a melding and a soap. The crate contains a
        grownups, a fader, and a charge. The bowl contains a hart and a venturing. Took a
         fader from the crate and put it into the box

        Pred: the box contains a four-wheeler, a rhetorics, a noises, a payback, an endeavour
        s, and a fader. the basket contains a bitching, a goys, a thunderheads, and an estima
        tions. the bag contains a melding and a soap. the crate contains a grownups and a cha
        rge. the bowl contains a hart and a venturing.

        Target: the box contains a four-wheeler, a rhetorics, a noises, a payback, an endeavo
        urs, and a fader. the basket contains a bitching, a goys, a thunderheads, and an esti
        mations. the bag contains a melding and a soap. the crate contains a grownups and a c
        harge. the bowl contains a hart and a venturing.
=======================================================================
Nav
=======================================================================


prefix:

   1 The attic is to the south of the game room. The utility room is to the north of t
     he attic. The antechamber is to the east of the utility room. The sun room is to
     the south of the utility room. The study is to the east of the antechamber. The l
     aundry room is to the west of the utility room. The recreation room is to the wes
     t of the antechamber. To get from the laundry room to the utility room, you must
     go

pred: to the east, then to the north.

target: to the east

---
prefix:

   2 The basement is to the west of the solarium. The boiler room is to the south of t
     he basement. The screen porch is to the north of the boiler room. The larder is t
     o the south of the screen porch. The recreation room is to the east of the screen
      porch. The office is to the north of the solarium. The attic is to the north of
     the recreation room. To get from the larder to the recreation room, you must go
pred: to the north, then to the east
target: to the north, then to the east

---
prefix:

   3 The cloakroom is to the south of the screen porch. The living room is to the nort
     h of the screen porch. The cellar is to the east of the cloakroom. The recreation
      room is to the west of the screen porch. To get from the cloakroom to the screen
      porch, you must go

pred: to the north
target: to the north
