# Supplementary material
Source: ML conference proceedings conference paper supplement (https://proceedings.neurips.cc/paper_files/paper/2021/hash/8e08227323cd829e449559bb381484b7-Abstract.html)
Supplement: Supplementary file 1 [file 8e08227323cd829e449559bb381484b7-Supplemental.zip › subneurips2021/src/train_and_predict.sh]

#!/bin/bash
CUDA_VISIBLE_DEVICES=5 python3 setup_t5_and_predict.py --ckpt 1002000 --experiment n/nr__ --model_dir models-t5/3Bnonuniform-n-nr3  &

CUDA_VISIBLE_DEVICES=6 python3 setup_t5_and_predict.py --ckpt 1007000 --experiment n/nextrap --model_dir models-t5/3Bn-n  &
CUDA_VISIBLE_DEVICES=8 python3 setup_t5_and_predict.py --ckpt 1006000 --experiment n/nextrap --model_dir models-t5/3Bn-n  &
CUDA_VISIBLE_DEVICES=9 python3 setup_t5_and_predict.py --ckpt 1008000 --experiment n/nextrap --model_dir models-t5/3Bn-n  &

CUDA_VISIBLE_DEVICES=10 python3 setup_t5_and_predict.py --ckpt 1006000 --experiment n/nrextrap --model_dir models-t5/3Bn-nr  &
CUDA_VISIBLE_DEVICES=11 python3 setup_t5_and_predict.py --ckpt 1007000 --experiment n/nrextrap --model_dir models-t5/3Bn-nr  &
CUDA_VISIBLE_DEVICES=15 python3 setup_t5_and_predict.py --ckpt 1008000 --experiment n/nrextrap --model_dir models-t5/3Bn-nr  &
