# Supplementary material
Source: ML conference proceedings conference paper supplement (https://proceedings.neurips.cc/paper_files/paper/2021/hash/8e08227323cd829e449559bb381484b7-Abstract.html)
Supplement: Supplementary file 1 [file 8e08227323cd829e449559bb381484b7-Supplemental.zip › subneurips2021/src/train_and_predict2.sh]

#!/bin/bash


CUDA_VISIBLE_DEVICES=0 python3 t5-finetune.py --model_name 3Bn-nr --data_dir data/navprobs/nrinterp/tsvs --from_model &
CUDA_VISIBLE_DEVICES=1 python3 t5-finetune.py --model_name 3Bn-n --data_dir data/navprobs/ninterp/tsvs --from_model &
CUDA_VISIBLE_DEVICES=2 python3 setup_t5_and_predict.py --ckpt 1001000 --experiment n/nrinterp --model_dir models-t5/3Bn-nr  &
CUDA_VISIBLE_DEVICES=3 python3 setup_t5_and_predict.py --ckpt 1001000 --experiment n/ninterp --model_dir models-t5/3Bn-n  &

wait

CUDA_VISIBLE_DEVICES=0 python3 t5-finetune.py --model_name 3Bn-nr --data_dir data/navprobs/nrinterp/tsvs --from_model &
CUDA_VISIBLE_DEVICES=1 python3 t5-finetune.py --model_name 3Bn-n --data_dir data/navprobs/ninterp/tsvs --from_model &
CUDA_VISIBLE_DEVICES=2 python3 setup_t5_and_predict.py --ckpt 1002000 --experiment n/nrinterp --model_dir models-t5/3Bn-nr  &
CUDA_VISIBLE_DEVICES=3 python3 setup_t5_and_predict.py --ckpt 1002000 --experiment n/ninterp --model_dir models-t5/3Bn-n  &
wait

CUDA_VISIBLE_DEVICES=0 python3 t5-finetune.py --model_name 3Bn-nr --data_dir data/navprobs/nrinterp/tsvs --from_model &
CUDA_VISIBLE_DEVICES=1 python3 t5-finetune.py --model_name 3Bn-n --data_dir data/navprobs/ninterp/tsvs --from_model &
CUDA_VISIBLE_DEVICES=2 python3 setup_t5_and_predict.py --ckpt 1003000 --experiment n/nrinterp --model_dir models-t5/3Bn-nr  &
CUDA_VISIBLE_DEVICES=3 python3 setup_t5_and_predict.py --ckpt 1003000 --experiment n/ninterp --model_dir models-t5/3Bn-n  &
wait

CUDA_VISIBLE_DEVICES=0 python3 t5-finetune.py --model_name 3Bn-nr --data_dir data/navprobs/nrinterp/tsvs --from_model &
CUDA_VISIBLE_DEVICES=1 python3 t5-finetune.py --model_name 3Bn-n --data_dir data/navprobs/ninterp/tsvs --from_model &
CUDA_VISIBLE_DEVICES=2 python3 setup_t5_and_predict.py --ckpt 1004000 --experiment n/nrinterp --model_dir models-t5/3Bn-nr  &
CUDA_VISIBLE_DEVICES=3 python3 setup_t5_and_predict.py --ckpt 1004000 --experiment n/ninterp --model_dir models-t5/3Bn-n  &
wait

CUDA_VISIBLE_DEVICES=0 python3 t5-finetune.py --model_name 3Bn-nr --data_dir data/navprobs/nrinterp/tsvs --from_model &
CUDA_VISIBLE_DEVICES=1 python3 t5-finetune.py --model_name 3Bn-n --data_dir data/navprobs/ninterp/tsvs --from_model &
CUDA_VISIBLE_DEVICES=2 python3 setup_t5_and_predict.py --ckpt 1005000 --experiment n/nrinterp --model_dir models-t5/3Bn-nr  &
CUDA_VISIBLE_DEVICES=3 python3 setup_t5_and_predict.py --ckpt 1005000 --experiment n/ninterp --model_dir models-t5/3Bn-n  &
wait

CUDA_VISIBLE_DEVICES=0 python3 t5-finetune.py --model_name 3Bn-nr --data_dir data/navprobs/nrinterp/tsvs --from_model &
CUDA_VISIBLE_DEVICES=1 python3 t5-finetune.py --model_name 3Bn-n --data_dir data/navprobs/ninterp/tsvs --from_model &
CUDA_VISIBLE_DEVICES=2 python3 setup_t5_and_predict.py --ckpt 1006000 --experiment n/nrinterp --model_dir models-t5/3Bn-nr  &
CUDA_VISIBLE_DEVICES=3 python3 setup_t5_and_predict.py --ckpt 1006000 --experiment n/ninterp --model_dir models-t5/3Bn-n  &
wait

CUDA_VISIBLE_DEVICES=0 python3 t5-finetune.py --model_name 3Bn-nr --data_dir data/navprobs/nrinterp/tsvs --from_model &
CUDA_VISIBLE_DEVICES=1 python3 t5-finetune.py --model_name 3Bn-n --data_dir data/navprobs/ninterp/tsvs --from_model &
CUDA_VISIBLE_DEVICES=2 python3 setup_t5_and_predict.py --ckpt 1007000 --experiment n/nrinterp --model_dir models-t5/3Bn-nr  &
CUDA_VISIBLE_DEVICES=3 python3 setup_t5_and_predict.py --ckpt 1007000 --experiment n/ninterp --model_dir models-t5/3Bn-n  &
wait

CUDA_VISIBLE_DEVICES=0 python3 t5-finetune.py --model_name 3Bn-nr --data_dir data/navprobs/nrinterp/tsvs --from_model &
CUDA_VISIBLE_DEVICES=1 python3 t5-finetune.py --model_name 3Bn-n --data_dir data/navprobs/ninterp/tsvs --from_model &
CUDA_VISIBLE_DEVICES=2 python3 setup_t5_and_predict.py --ckpt 1008000 --experiment n/nrinterp --model_dir models-t5/3Bn-nr  &
CUDA_VISIBLE_DEVICES=3 python3 setup_t5_and_predict.py --ckpt 1008000 --experiment n/ninterp --model_dir models-t5/3Bn-n  &
wait

CUDA_VISIBLE_DEVICES=0 python3 t5-finetune.py --model_name 3Bn-nr --data_dir data/navprobs/nrinterp/tsvs --from_model &
CUDA_VISIBLE_DEVICES=1 python3 t5-finetune.py --model_name 3Bn-n --data_dir data/navprobs/ninterp/tsvs --from_model &
CUDA_VISIBLE_DEVICES=2 python3 setup_t5_and_predict.py --ckpt 1009000 --experiment n/nrinterp --model_dir models-t5/3Bn-nr  &
CUDA_VISIBLE_DEVICES=3 python3 setup_t5_and_predict.py --ckpt 1009000 --experiment n/ninterp --model_dir models-t5/3Bn-n  &
wait

CUDA_VISIBLE_DEVICES=0 python3 t5-finetune.py --model_name 3Bn-nr --data_dir data/navprobs/nrinterp/tsvs --from_model &
CUDA_VISIBLE_DEVICES=1 python3 t5-finetune.py --model_name 3Bn-n --data_dir data/navprobs/ninterp/tsvs --from_model &
CUDA_VISIBLE_DEVICES=2 python3 setup_t5_and_predict.py --ckpt 1010000 --experiment n/nrinterp --model_dir models-t5/3Bn-nr  &
CUDA_VISIBLE_DEVICES=3 python3 setup_t5_and_predict.py --ckpt 1010000 --experiment n/ninterp --model_dir models-t5/3Bn-n  &
wait

CUDA_VISIBLE_DEVICES=0 python3 t5-finetune.py --model_name 3Bn-nr --data_dir data/navprobs/nrinterp/tsvs --from_model &
CUDA_VISIBLE_DEVICES=1 python3 t5-finetune.py --model_name 3Bn-n --data_dir data/navprobs/ninterp/tsvs --from_model &
CUDA_VISIBLE_DEVICES=2 python3 setup_t5_and_predict.py --ckpt 1011000 --experiment n/nrinterp --model_dir models-t5/3Bn-nr  &
CUDA_VISIBLE_DEVICES=3 python3 setup_t5_and_predict.py --ckpt 1011000 --experiment n/ninterp --model_dir models-t5/3Bn-n  &
wait

CUDA_VISIBLE_DEVICES=0 python3 t5-finetune.py --model_name 3Bn-nr --data_dir data/navprobs/nrinterp/tsvs --from_model &
CUDA_VISIBLE_DEVICES=1 python3 t5-finetune.py --model_name 3Bn-n --data_dir data/navprobs/ninterp/tsvs --from_model &
CUDA_VISIBLE_DEVICES=2 python3 setup_t5_and_predict.py --ckpt 1012000 --experiment n/nrinterp --model_dir models-t5/3Bn-nr  &
CUDA_VISIBLE_DEVICES=3 python3 setup_t5_and_predict.py --ckpt 1012000 --experiment n/ninterp --model_dir models-t5/3Bn-n  &
wait

CUDA_VISIBLE_DEVICES=0 python3 t5-finetune.py --model_name 3Bn-nr --data_dir data/navprobs/nrinterp/tsvs --from_model &
CUDA_VISIBLE_DEVICES=1 python3 t5-finetune.py --model_name 3Bn-n --data_dir data/navprobs/ninterp/tsvs --from_model &
CUDA_VISIBLE_DEVICES=2 python3 setup_t5_and_predict.py --ckpt 1013000 --experiment n/nrinterp --model_dir models-t5/3Bn-nr  &
CUDA_VISIBLE_DEVICES=3 python3 setup_t5_and_predict.py --ckpt 1013000 --experiment n/ninterp --model_dir models-t5/3Bn-n  &

wait

CUDA_VISIBLE_DEVICES=2 python3 setup_t5_and_predict.py --ckpt 1014000 --experiment n/nrinterp --model_dir models-t5/3Bn-nr  &
CUDA_VISIBLE_DEVICES=3 python3 setup_t5_and_predict.py --ckpt 1014000 --experiment n/ninterp --model_dir models-t5/3Bn-n  &


#CUDA_VISIBLE_DEVICES=9 python3 t5-finetune.py --model_name 3Bn-nr3 --data_dir data/navprobs/nr/tsvs &
 
