# Supplementary material
Source: ML conference proceedings conference paper supplement (https://proceedings.neurips.cc/paper_files/paper/2021/hash/8e08227323cd829e449559bb381484b7-Abstract.html)
Supplement: Supplementary file 1 [file 8e08227323cd829e449559bb381484b7-Supplemental.zip › subneurips2021/src/train_and_predict_mini.sh]

#!/bin/bash


CUDA_VISIBLE_DEVICES=0 python3 t5-finetune.py --model_name 3Bn-nr --data_dir data/navprobs/nrinterp/tsvs --from_model &
CUDA_VISIBLE_DEVICES=1 python3 t5-finetune.py --model_name 3Bn-n --data_dir data/navprobs/ninterp/tsvs --from_model &
